# **Title page**

**Title:** Mesoamerica is a cradle and the Brazilian Atlantic Forest is a museum of Neotropical butterfly diversity (Lepidoptera: Nymphalidae: Brassolini)

**Authors:** Pável Matos-Maravi<sup>1,2,3\*</sup>, Niklas Wahlberg<sup>4</sup>, André V. L. Freitas<sup>5</sup>, Phil J. DeVries<sup>6</sup>, Alexandre Antonelli<sup>1,2,7</sup>, Carla M. Penz<sup>6</sup>

## **Full correspondence addresses:**

<sup>1</sup> Department of Biological and Environmental Sciences, University of Gothenburg, Gothenburg, Sweden

<sup>2</sup> Gothenburg Global Biodiversity Centre, Gothenburg, Sweden

<sup>3</sup> Biology Centre of the Czech Academy of Sciences, Institute of Entomology, České Budějovice, Czech Republic

<sup>4</sup> Department of Biology, Lund University, Lund, Sweden

<sup>5</sup> Departamento de Biologia Animal, Instituto de Biologia, Universidade Estadual de Campinas, Campinas, SP, Brazil

<sup>6</sup> Department of Biological Sciences, University of New Orleans, New Orleans, LA, USA

<sup>7</sup> Royal Botanical Gardens Kew, TW9 3AE Richmond, United Kingdom

\* Corresponding author (E-mail: [pavel.matos@entu.cas.cz](mailto:pavel.matos@entu.cas.cz), ORCID id: <https://orcid.org/0000-0002-2885-4919>)

# **Abstract**

Regional species diversity is ultimately explained by speciation, extinction, and dispersal. Here we estimate dispersal and speciation rates in Neotropical rainforest biomes to propose an explanation for the distribution and diversity of extant butterfly species. We focus on the butterfly tribe Brassolini (Owl butterflies and allies): a Neotropical group that comprises 17 genera and 108 species, most of them endemic to rainforest biomes. We infer a total-evidence species tree of Brassolini using the multispecies coalescent framework. By applying biogeographical stochastic mapping, we infer ancestral ranges and estimate rates of butterfly dispersal and cladogenesis at the scale of millions of years. We suggest that speciation in Mesoamerica and the northwestern flank of the Andes has only increased within the past 2 million years. In contrast, speciation in the Brazilian Atlantic Forest has been constant throughout the past 10 million years. The disparate species diversification dynamics may be explained by the geological and environmental history of each bioregion: the Central American Arc was likely intermittently inundated by water for most of the Miocene (15 to 3 Ma), thus, reduced landmass area until the Plio-Pleistocene may have hindered species diversification; the Atlantic Forest, in turn, likely went through episodes of expansion and contraction and has probably been biologically connected with the Amazonian forest since at least the early Miocene until the Pliocene, about 5 Ma. Importantly, a longer time for speciation in the Atlantic Forest than in Mesoamerica plus NW Andes is ruled out because the dispersal rates into both regions increased simultaneously in the middle-Miocene. Our results reveal a mosaic of bioregion-specific evolutionary histories within the Neotropics, where species have diversified rapidly (cradles: e.g., Mesoamerica), have accumulated gradually (museums: e.g., Atlantic Forest), or have alternately diversified and accumulated (e.g., Amazonia).

47

48 **Keywords:** Speciation; dispersal; multispecies coalescent; total-evidence analyses; ancestral

49 state inference; biogeographical stochastic mapping

50

# Introduction

Terrestrial bioregions are heterogeneous, and some areas accumulate greater diversity and endemic species than others. An explanation for this biogeographical pattern includes three evolutionary mechanisms: *in situ* species origination, extinction, and dispersal (Goldberg et al. 2005, Jablonski et al. 2006). For example, a species-rich region can attain its present diversity by exceptionally high rates of speciation, becoming a “cradle of diversity”, or by low rates of species extinction, becoming a “museum of diversity”. Furthermore, a species-rich region might be a “source of diversity” when dispersal out of the region is high, or a “sink of diversity” when *in situ* species diversity accumulates from external sources by dispersal into the region. Characterizing the interplay among speciation, extinction, and dispersal is thus highly relevant for understanding the origin and evolution of total regional diversity and endemism (Wiens and Donoghue 2004, Roy and Goldberg 2007).

The Neotropical region contains a great deal of the world’s biodiversity and endemism. Most of such diversity is concentrated in tropical rainforests in Central America, the Amazon basin and the Atlantic Forest in southeastern Brazil. However, there is no consensus on whether the currently scattered rainforests were once connected, and for how long (Jaramillo and Cárdenas 2013), and whether they are centers of “ecological stability” that share a common evolutionary history (Moritz et al. 2000). Mammals and birds in Neotropical biodiversity hotspots, including the Brazilian Atlantic Forest, and rainforests in Mesoamerica and the neighboring area Chocó (Myers et al. 2000), apparently originated at faster rates and exported more lineages compared to surrounding areas, suggesting that such hotspots are both cradles and sources of diversity (Igea and Tanentzap 2019). Some non-hotspots regions are, in contrast, museums of diversity given

the old and gradual accumulation of species through time, such as Amazonia for butterflies (Condamine et al. 2012). It thus seems that the checkered spatial assemblage of Neotropical rainforests acting as cradle and museum areas might explain why the Neotropics as a whole can be now considered both museum and cradle of diversity (McKenna and Farrell 2006, Moreau and Bell 2013, Antonelli et al. 2018a). However, the impacts of geological and paleoenvironmental changes in the Neotropics together with the roles of *in situ* speciation and dispersal have seldom been jointly elucidated in individual rainforest hotspots.

Here we test whether there was significant biotic exchange among Neotropical rainforests during the Neogene and Quaternary periods (i.e., the past 23 Ma), which might indicate physical connectivity of biomes. If connection among biomes existed, we aim to quantify its timing and magnitude in terms of dispersal and speciation of taxa associated to rainforests. To do this, we estimate colonization rates (dispersal and establishment in a new area) and *in situ* speciation of butterflies that occur in tropical rainforest hotspots. We focus on Mesoamerica, the northwestern slope (NW) of the Andes (including e.g., Chocó), and the Brazilian Atlantic Forest, compared to neighboring areas such as the South American “dry diagonal” (Fig. 1). Butterflies in the tribe Brassolini (Nymphalidae: Satyrinae) are particularly suited to address our question because they are exclusively Neotropical and have about one third of their species diversity endemic to rainforest hotspots (see Penz 2007 for an overview).

Brassolini constitutes a monophyletic group (Freitas and Brown 2004, Wahlberg et al. 2009, Espeland et al. 2018, Chazot et al. 2019a). Studies that focused on individual genera used adult morphology (Penz 2008, 2009a, b, Garzón-Orduña and Penz 2009) and DNA data (Penz et al.

2011a, Shirai et al. 2017) to infer robust species-level phylogenies, but several deep nodes had weak or even conflicting phylogenetic support in tribal-level analyses (Penz et al. 2013). We infer a time-calibrated species by merging all previous datasets and generating new DNA and morphological data to clarify the phylogeny of Brassolini under the multispecies coalescent framework. Specifically, we use this phylogeny to test the following hypotheses on diversification and dispersal among Neotropical rainforest biomes:

1. Amazonia is the primary source of butterfly species diversity in the Neotropics due to its large size, high number of standing lineages, long-term accumulation of species, and episodic increases of diversification rate (alternating cradle and museum of diversity), in association with high dispersal toward other Neotropical regions (source of diversity).

Rapid species diversification of some butterfly groups occurred since at least the Oligocene (Matos-Maraví 2016), and species might have gradually accumulated in Amazonia since that time (Condamine et al. 2012). More recent diversification episodes supporting Amazonia as a cradle of diversity could have been triggered by paleoenvironmental changes, such as the retreat of the Pebas wetland (Antonelli et al. 2009, Antonelli and Sanmartín 2011, Chazot et al. 2019b). For vertebrate and plant lineages, Amazonia has also been the main source of species diversity by means of dispersal during the past 60 million years (Antonelli et al. 2018b).

2. Mesoamerica and the NW Andes, considered together, became more diverse due to dispersal events into this region during the Miocene (sink of diversity), and more recent, rapid *in situ* speciation in the Pleistocene (cradle of diversity).

Landmass likely emerged in Central America and Chocó after the collision of the Panama Block and northwestern South America by the late Oligocene–early Miocene (Coates and Stallard 2013, Jaramillo 2018); with Uranium-lead dating confirming that segments of the Panama arc had already emerged by 13–15 Ma (Montes et al. 2015). However, shallow water likely existed in the region until ~3 to 4 Ma (O’Dea et al. 2016, Jaramillo et al. 2017a), and while dispersal might have significantly increased since the early Miocene about 20 Ma, facilitated by land availability (Bacon et al. 2015), *in situ* species diversification might have been restricted by lowland area water inundations until the Plio-Pleistocene (Mullen et al. 2011, Hosner et al. 2016).

3. The Brazilian Atlantic Forest is characterized by old biotic interchange with Amazonia until ~10 to 15 Ma (sink of diversity), and younger <10 Ma biotic interchange with the dry diagonal (source of diversity). However, it is not clear whether endemic diversity to the Atlantic Forest arose by recent, fast diversification in the Pleistocene (cradle of diversity) or by gradual accumulation of species with old and constant *in situ* speciation (museum of diversity).

The onset of the global cooling at ~10 to 15 Ma likely drove the expansion of open environments between Amazonia and the Atlantic Forest (Simon et al. 2009). Apparently, intermittent forest expansions into the dry diagonal occurred throughout the Neogene and Pleistocene (Werneck 2011, Trujillo-Arias et al. 2017), and Amazonia and the Atlantic Forest might have repeatedly been in contact (Ledo and Colli 2017, Capurro et al. 2018). Biotic interchange from the Brazilian Atlantic Forest toward the dry diagonal might have been a geologically more recent event, since at least 5 Ma (Costa 2003, Batalha-Filho et al. 2013, Thomé et al. 2016).

# **Material and methods**

## *Taxon sampling*

Specimens were collected in Mexico, Costa Rica, Ecuador, Peru and Brazil (Supplementary material Appendix 1 Table S1), and identified to species based on various sources (Casagrande 2002, 2004, Austin et al. 2007, Penz 2008, 2009a, b, Garzón-Orduña and Penz 2009, Penz et al. 2017, 2011a, b, Chacón et al. 2012).

## *Molecular dataset*

Based on protocols in Wahlberg and Wheat (2008), we Sanger-sequenced fragments of the mitochondrial COI gene (1,475 bp) and the nuclear genes CAD (850 bp), EF1 $\alpha$  (1,240 bp), GAPDH (691 bp), RpS5 (617 bp) and *wingless* (400 bp) (outsourced to Macrogen, Seoul). We obtained genetic data from 81 individuals classified in 57 out of 108 valid species in 15 out of 17 Brassolini genera (Penz 2007). The two missing genera (*Aponarope* and *Mielkella*) are monotypic. We retrieved COI sequences available from the BOLD database (<http://boldsystems.org>) for seven additional species; thus, our molecular dataset consisted of 15 genera and 64 species. To root the phylogeny, we included genetic data of 19 outgroup taxa in the subfamily Satyrinae from public data deposited at GenBank. All DNA sequences from this study are in GenBank (accession numbers MK551348–MK551551).

## *Morphological and total-evidence dataset*

Our morphological dataset included 255 characters (201 from adults and 54 from early stages) for 64 species from all 17 Brassolini genera. The morphological matrix was concatenated from



previous studies (Penz 2007, 2008, 2009a, b, Garzón-Orduña and Penz 2009, Penz et al. 2013) by eliminating duplicate characters and scoring data for species missing entries. Specimens used were the same as listed in the original publications. The combined molecular and morphological dataset comprised all genera and 84 out of 108 Brassolini species. We call this the total-evidence dataset, which we used to infer a time-calibrated phylogeny.

# *Distribution dataset*

We delineated bioregions using geo-referenced occurrences of extant Brassolini, rather than defining areas based on geological or other sources of data. We retrieved 7,255 geo-referenced occurrence points identified at the species level, of which 6,378 points came from GBIF (<https://gbif.org>; retrieved on 21<sup>st</sup> January 2019) and 881 points from the ATLANTIC BUTTERFLIES dataset (Santos et al. 2018). We uploaded the geo-referenced occurrences to the web application Infomap Bioregions (Edler et al. 2017) at <http://bioregions.mapequation.org/>. We set the maximum and minimum values for cell sizes to 4 and 2, and for cell capacities to 80 and 4. We used different values of cluster cost, from 0.1 to 3.0, in steps of 0.1. The number of inferred areas remained stable between values of 1.9 and 2.5 and, thus, received the strongest support: 1) Mesoamerica plus NW Andes, 2) Brazilian Atlantic Forest, and 3) the remaining tropical South America, including the Amazon drainage basin and the seasonally dry diagonal biomes Cerrado and Caatinga (Fig. 1).

To inform the biogeographical and *in situ* speciation rate analyses, we generated a species-level distributional dataset. We surveyed the literature to score species occurrences in the defined bioregions because the geo-referenced dataset did not include all Brassolini species. To

investigate dispersal patterns across the South American dry diagonal, we kept this area separate. We used distributional maps and observations, not always with primary geographic coordinates, from taxonomic revisions (Bristow 1981, 1982, 1991, Casagrande 2002, Furtado and Campos-Neto 2004, Penz 2008, 2009a, b, Garzón-Orduña and Penz 2009, Penz et al. 2017), and also published butterfly inventories in Mesoamerica (DeVries 1983, 1994, Janzen and Hallwachs 2009, Basset et al. 2015), Amazonia (Pereira Martins et al. 2017), Cerrado (Pinheiro and Emery 2006, Emery et al. 2006, Silva et al. 2012, Pereira Martins et al. 2017, Dickens et al. 2019), Caatinga (Zacca and Bravo 2012), and the Atlantic Forest (Santos et al. 2011, 2018, Pérez et al. 2017, Melo et al. 2019, Soldati et al. 2019). We call this the presence/absence biogeographical dataset.

# *Total-evidence phylogenetic inference and divergence time calibration*

We inferred time-calibrated species trees using the StarBEAST2 package (Ogilvie et al. 2017) available in BEAST v2.5.2 (Bouckaert et al. 2014). We removed the species *Opsiphanes camena* from the dataset because it had only 325 bp of the COI locus, and its phylogenetic position was not stable in a preliminary analysis (Supplementary material Appendix 1). We used a gene-based partitioning strategy, each having unlinked tree models in the multispecies coalescent framework. We performed model averaging over 31 substitution models available in the bModelTest v1.1.2 package (Bouckaert and Drummond 2017). We applied uncorrelated relaxed-clock models for all partitions because strict clock models were rejected based on the stepping-stone method (Supplementary material Appendix 1). We estimated clock rates relative to the mitochondrial mean clock rate fixed to 1.0, and we used log normal distribution for the relative clock mean priors ( $M = 0$ ,  $S = 1$ ). We used the Yule tree model because it received decisive

support over the birth-death tree model based on path-sampling steps (Supplementary material Appendix 1). We added the morphological dataset onto the species tree and we conditioned the characters to the Markov model (Lewis 2001).

Inasmuch as there are no described fossils of Brassolini, we relied on secondary calibrations to time-calibrate the species tree. We conservatively used uniform distributions encompassing the 95% highest posterior density (HPD) from a large fossil-calibrated, genus-level butterfly phylogeny (Chazot et al. 2019a) to constrain six outgroup nodes:

- 1) The crown age of the subfamily Satyrinae (46–65 Ma),
- 2) The divergence of the tribes Melaniti and Dirini (27–41 Ma),
- 3) The crown age of the tribe Satyrini (38–55 Ma),
- 4) The crown node of the subtribes Lethina, Parargina and Mycalesina to (31–46 Ma),
- 5) The crown node of the subtribes Pronophilina, Euptychiina, Satyrina and Erebiina (31–44 Ma),
- 6) The divergence of the tribes Brassolini and Morphini (34–50 Ma).

The analyses were run four independent times for 300 million generations, via the CIPRES Science Gateway v3.3 (Miller et al. 2010). We sampled 20,000 trees from the posterior distribution but we discarded the first 25% as burnin. We checked convergence among runs by inspecting that the estimated sample sizes (ESS) were above 200 using Tracer v1.7.1 (Rambaut et al. 2018). We merged the four independent runs using LogCombiner (part of the BEAST

v2.5.2 package) and we summarized the post-burnin species trees using the maximum clade credibility (MCC tree) method in TreeAnnotator (part of the BEAST v2.5.2 package).

### *In situ speciation and dispersal among bioregions through time*

We estimated ancestral geographic ranges and colonization rates among bioregions using the dispersal-extinction-cladogenesis (DEC) model (Ree et al. 2005), as implemented in the R v3.5.3 (R Core Team 2019) package BioGeoBEARS v1.1.2 (Matzke 2013). We used the species-level presence/absence biogeographical dataset and the four defined bioregions: 1) Mesoamerica plus NW Andes, 2) Atlantic Forest, 3) Amazonia, and 4) Dry diagonal. We did not constrain any *a priori* dispersal multiplier, nor did we stratify dispersal rates across the phylogeny. To account for ancestral state uncertainty, we carried out 100 biogeographical stochastic mappings (BSM; Dupin et al. 2017). To account for divergence time uncertainty, we used 100 random topologies from the BEAST2 posterior distribution. To account for phylogenetic uncertainty of 25 missing species, we randomly added such lineages to their currently assigned genera in the 100 posterior phylogenies. In this case, we assumed that phylogenetic diversity per genus was maximized and we placed missing taxa in the crown genera given our comprehensive taxonomic sampling. All genera are monophyletic, but we conservatively joined *Selenophanes* and *Catoblepia* (posterior probability, PP = 1.0; Fig. 2) when assigning missing species because the monophyly of *Catoblepia* was only moderately supported (PP = 0.75).

We estimated the number of dispersal events and within-area-cladogenesis events (*in situ* speciation) by simulating areas on nodes based on the 10,000 pseudoreplicated biogeographic histories (100 BSM  $\times$  100 posterior species trees). We calculated colonization rates through time

as  $c_{XtoY}(t_1) = d_{XtoY}(t_1) / L(t_1)$ , where  $d_{XtoY}(t_1)$  is the number of inferred dispersal events from area X to Y in a 1-million year interval, and  $L(t_1)$  is the total length of all branches in the 1-million-year interval (Antonelli et al. 2018b). In addition, we calculated the relative number of *in situ* speciation events through time as  $\lambda(t_1) = s(t_1) / s(t_0 / t_{0+1})$ , where  $s(t_1)$  is the number of within-area cladogenesis in a 1-million-year interval, and  $s(t_0 / t_{0+1})$  is the number of within-area cladogenesis in the previous 1-million-year interval ( $t_0$ ) relative to the number of within-area cladogenesis in time intervals  $t_0$  and  $t_1$  (modified from Xing and Ree 2017).

### *Speciation within bioregions through time*

To have a second independent estimate of *in situ* speciation through time, we calculated speciation rates for all tips and branches in the MCC species tree using BAMM v2.5.0 (Rabosky 2014). To account for the 25 missing species, we generated clade-specific sampling fractions at the genus level. We used the R package BAMMtools v2.1.6 (Rabosky et al. 2014) to estimate prior values for the evolutionary rate parameters, and we assigned the expected number of shifts to 1.0 as recommended for phylogenies including ~100 species (Rabosky 2014). We ran the analysis for 10 million generations and we sampled the event data every 1,000 generations. After discarding the first 20% samples as burnin, we checked convergence by inspecting that the ESS value was higher than 200 and the likelihood estimates reached a stationary distribution.

First, we estimated speciation rates within bioregions at present using the function “getTipRates” in BAMMtools. We computed tip-specific mean speciation rates for those species occurring only in one bioregion, i.e., the endemic lineages. Second, we used the function “dtRates” in BAMMtools to compute mean speciation rates along branches in ~1-million year intervals (tau

parameter set to 0.05). We assigned the most probable inferred area from the 10,000 BSMs to the points where branches cross time intervals (Igea and Tanentzap 2019). When the most probable area for a node and its parental one were the same, we assumed that the branch connecting both nodes occurred in such an area. When inferred areas for a node and its parental one were different, we assumed that the dispersal event occurred stochastically along the branch. We computed mean speciation rates only for nodes that most probably occurred in a single bioregion.

All the datasets from this study can be found in TreeBASE (ID 25040) and Dryad (DOI: XXXXX).

## Results

### *Phylogenetic and divergence time uncertainty*

The multispecies coalescent model recovered low posterior probabilities for deeper nodes (0.39–0.90 in the MCC tree; Fig. 2). In contrast, a concatenation-based analysis using only the molecular dataset (Supplementary material Appendix 1) produced higher posterior probabilities for the deep nodes (0.97–1.00). This suggests that the molecular dataset held strong phylogenetic signal, but the multispecies coalescent model might have better reflected the phylogenetic uncertainty in the morphological dataset. The high uncertainty in such nodes coincided with short branches typical of a very fast diversification process. We estimated that these nodes had ages between 15 and 17 Ma (entire highest posterior density HPD, 10.87–20.89 Ma). The total-evidence dataset supported posterior probability of 1.0 for the crown node of almost all non-monotypic genera, regardless of phylogenetic method.

# *Ancestral bioregions and colonization rates through time*

The inferred ranges coming from the 10,000 pseudoreplicated biogeographic histories and plotted against the MCC species tree in Fig. 2 suggested that Brassolini most probably ( $Pr = 0.36$ ) originated in Amazonia at 21 Ma (entire HPD, 16.67–27.16 Ma). The early rapid radiation of Brassolini between 15 and 17 Ma also probably took place in Amazonia ( $Pr = 0.30$ – $0.52$ ). Although we allowed any lineage to occur in an unlimited number and combination of areas, the DEC model mostly inferred ancestral ranges that were single areas.

Dispersal out of Amazonia had the highest rates compared to other bioregions (Fig. 3). It increased since the early Miocene and peaked at ~10 Ma, followed by decreasing dispersal to other bioregions until ~6 Ma. Dispersal from Amazonia to Mesoamerica had a sharp increase by ~5 Ma and is currently the highest rate among other dispersal types (Fig. 3A). Dispersal into Mesoamerica from other bioregions occurred throughout most of the Miocene, and peaked at ~10 Ma (Supplementary material Appendix 1). Dispersal out of Mesoamerica + NW Andes, however, was very low through time, and only since the past ~2 Ma did it exponentially increase from this region toward Amazonia (Fig. 3A). Dispersal from Amazonia to the dry diagonal increased throughout the Plio-Pleistocene and has since then surpassed dispersal from Amazonia to Atlantic Forest (Fig. 3B & 3C). Dispersal from the Atlantic Forest into Amazonia was higher at ~10 Ma than from any other region into Amazonia (Fig. 3C). Nonetheless, dispersal into or out of the Atlantic Forest from/to any other bioregion declined from ~10 to 2 Ma, rendering the Atlantic Forest isolated for most of the late Miocene and Pliocene. Only since the Pleistocene ~2

Ma dispersal into and from the dry diagonal has increased until the present. The Atlantic Forest is currently linked by dispersal mostly with the dry diagonal biome (Fig. 3D).

### *In situ speciation through time*

The relative rates of *in situ* cladogenesis estimated in BioGeoBEARS and *in situ* speciation rates estimated in BAMM were congruent (Fig. 4). *In situ* speciation rates slightly increased through time in all areas except in the dry diagonal, which has had near zero *in situ* cladogenesis.

Diversification began earlier in the Atlantic Forest at ~10 Ma, specifically in the clade comprising *Penetes*, *Orobrassolis* and *Blepolenis*, among others. In contrast, speciation sharply increased in Mesoamerica only at ~2 to 3 Ma. At present, the speciation rate in Mesoamerica + NW Andes is similar to Amazonian lineages, both being much higher than in the Atlantic Forest (Fig. 4C).

## **Discussion**

Here we investigated the role of *in situ* speciation and dispersal to understand the origin of species in the butterfly tribe Brassolini. One third of those species are endemic to rainforests in Mesoamerica, NW Andes and the Brazilian Atlantic Forest. Recent and rapid butterfly speciation occurred in Mesoamerica and NW Andes, suggesting that it acted as a cradle of diversity. In contrast, low and constant diversification since at least ~10 Ma has shaped Brassolini endemic diversity in the Atlantic Forest. This finding, coupled with the survival of old lineages found mainly in montane habitats in the Atlantic Forest suggests that this region acts as a museum of diversity.



A longer time for speciation in the Atlantic Forest is not supported because dispersal into Mesoamerica and NW Andes occurred near-simultaneously as dispersal into the Atlantic Forest. Therefore, we argue that the uneven origin of endemic species among the Neotropical rainforest bioregions reflect the geological and environmental changes that took place throughout the Neogene and Pleistocene, including the availability of substantial landmass in Mesoamerica and Chocó by ~3 to 4 Ma and the spread of wet forest into what is now the South American Dry Diagonal during the past 10 Ma.

### *Strengths and weaknesses of the approach*

There have been great improvements in tools that help quantifying geographic range evolution and diversification rates, but their assumptions might not be biologically realistic. We are aware of these limitations and took them into account in the interpretation of our results. First, by using the DEC model, we assumed no species extinction in the phylogeny of extant Brassolini. Simulation analyses comparing the DEC and state-dependent diversification models suggested that the estimation of ancestral areas can be robust when extinction rates were low, or not associated to particular geographic areas and clades (Matzke 2014). The lack of Brassolini fossils precludes assessing this directly, but a better fit of the Yule process over the birth-death model suggests that extinction was probably low to moderate during the timeframe of their diversification, and might not have substantially biased our inferences.

Second, BAMM's likelihood function and the prior model used for estimating diversification rate shifts were contested by Moore et al. (2016), although further evaluation of BAMM via simulated data suggested that it can infer speciation rates accurately from phylogenies of extant

species (Rabosky et al. 2017). We have conservatively focused on *in situ* species origination rate to explain lineage accumulation within bioregions, and have not used the extinction rate estimates of Brassolini. We also used a second, fundamentally-distinct measure of *in situ* cladogenesis (Xing and Ree 2017) that corroborated the pattern of recent and rapid speciation in Mesoamerica + NW Andes, and an older and lower speciation rate in the Atlantic Forest.

Our approach to disentangle *in situ* speciation from dispersal to understand the origin of within-area species diversity has two strengths. First, we defined bioregions that fit the distribution and composition of Brassolini species by using geo-referenced occurrences. This approach revealed a clustering of butterfly communities in southern North America, Mesoamerica, and the NW Andes, which are regions that belong to different biogeographic dominions (Morrone 2014). Our inference of large bioregions for Brassolini agrees with its apparent poor spatial structuring and high dispersal capabilities. For instance, given a suitable environment, ancestral *Bia* had the capability to disperse across pan-Amaozonia in only 1,463–3,115 years (Penz et al. 2015). The delimitation of Mesoamerica + NW Andes and the Atlantic Forest as separate bioregions has likely been determined by ecological and habitat suitability rather than geographical barriers to Brassolini dispersal; this being a similar biogeographical pattern found in other species restricted to Neotropical rainforests (Dexter et al. 2017, Pérez-Escobar et al. 2019).

Second, we used a multispecies coalescent framework which outperforms the concatenation-based approach when facing incomplete taxon sampling and incomplete lineage sorting (Liu et al. 2015, Ogilvie et al. 2017). Our comprehensive dataset including molecular and morphological characters allowed us to simultaneously use several lines of evidence for recognizing and dating

speciation events. It is important to note that the Bayesian probabilistic framework applied here considered three types of uncertainties: phylogenetic, temporal and taxonomic sampling. This Bayesian approach contributed toward a better assessment of confidence intervals when estimating dispersal and diversification rates.

# *Species diversification and dispersal in bioregions*

We calculated probability densities of dispersal and speciation rates that supported three distinct evolutionary processes: recent and fast speciation in Mesoamerica + NW Andes, old diversification dynamics with low speciation rates in Atlantic Forest, and episodic increases in speciation rate of Amazonian lineages. Our results suggest that Brassolini diversified mainly in Amazonia and the Atlantic Forest from about 23 to 5 Ma. Early diversification might have been accompanied by increasing dispersal out of these two bioregions. In the case of Amazonia, the Miocene marine incursions known as the Pebas wetland system (Wesselingh and Salo 2006) may have not drastically limited dispersal and diversification of Brassolini as it likely did for other butterfly groups (Chazot et al. 2019b). These marine flooding events were probably short-lived, and at least two dated events at ~17.8 Ma and ~13.7 (Jaramillo et al. 2017b) were concurrent with the early and rapid cladogenesis events of Brassolini in Amazonia (Fig. 2). The Pebas wetland might in fact have increased opportunities for dispersal and diversification of some typical coastal plants (Bernal et al. 2019), including many of the butterflies' hostplants in the region: mainly Aracaceae (palms), Poaceae (bamboo) and Zingiberales such as Marantaceae (Beccaloni et al. 2008, Janzen et al. 2009). Therefore, the evolutionary consequences of the Miocene marine incursions in western Amazonia might have been mixed, restricting dispersal

and diversification in some lineages while providing ecological opportunities for others, such as Brassolini butterflies.

In the case of the Brazilian Atlantic Forest, Miocene expansions of wet forests into Amazonia through the dry diagonal might have been determinants of ancient butterfly diversity. Forest connections have been documented mainly for the Quaternary Period based on palynological data and phylogeographic studies at the population level (e.g., Werneck 2011, Prates et al. 2016, Trujillo-Arias et al. 2017, and references therein). Although evidence of Neogene connection between the Atlantic Forest and Amazonia is still scarce, this study suggests that Miocene dispersal rates between these wet forest biomes were higher than in the Plio-Pleistocene. We suggest that Miocene wet forest expansions might have represented ecological opportunities for Brassolini to disperse across Central Brazil, either by increased sizes of wet forest galleries in the dry diagonal biome, or by fully connecting Amazonia and Atlantic Forest.

By the Plio-Pleistocene, speciation in Mesoamerica and NW Andes seems to have increased and surpassed the speciation rate in the Atlantic Forest. Two key events might explain this shift in diversification dynamics: the emergence of landmass in Panama, and the expansion of open environments during the late Miocene and Pliocene. Biotic dispersal into Mesoamerica from South America likely occurred throughout most of the Miocene (e.g., Mullen et al. 2011, Bacon et al. 2015). However, only at the end of the Pliocene did shallow water fully recede from the region (Coates et al. 2004, Montes et al. 2012), thus increasing opportunities for terrestrial species diversification. In contrast, speciation in the Atlantic Forest remained low and dispersal out of this region decreased until the mid-Pleistocene. These events coincided with the expansion

of open environments in the American continent and between Amazonia and Atlantic Forest since the late Miocene (Simon et al. 2009, Edwards et al. 2010, Strömberg 2011, Werneck 2011). The contraction of Atlantic Forest may have restricted speciation to montane habitats in southeastern Brazil where most extant species occur, which explains why speciation rates in this region might have apparently remained low through time, with old lineages surviving in remnants of rainforest.

#### *Consequences for Brassolini classification*

Brassolini has been subdivided in three subtribes, the monotypic Biina and Naropina, and polytypic Brassolina (Casagrande 1995, Penz 2007), but here *Narope* falls within Brassolina. At the genus level, our analyses support sister taxa relationships between *Dynastor* and *Dasyophthalma*, *Opoptera* and *Narope*, *Selenophanes* and *Catoblepia*, *Orobrassolis* and *Blepolepis*, and *Brassolis* appears as sister to the *Opsiphanes*-group (sensu Penz 2007) — some of which are novel. We propose the following changes to the Brassolini classification at the subtribe and species levels:

1) Naropina is subsumed within Brassolina. Brassolini is thus redefined to include the subtribes Biina (monotypic) and Brassolina.

2) The monotypic *Aponarope* is subsumed within *Narope*. Stichel (1916) originally described *Narope sutor*, but this species was later segregated in the monotypic *Aponarope* (Casagrande 1982). We revise the genus assignment for *Narope sutor*, REV. COMB., and synonymize *Aponarope*, NEW SYN.

3) *Selenophanes orgetorix*, NEW COMB. This species grouped with members of *Selenophanes* with high posterior probability (see also Shirai et al. 2017), justifying the proposed new combination.

# *Conclusions*

This study suggests that the Neotropics as a whole consists of a regional network of museums and cradles of diversity. We tested this hypothesis using a total-evidence phylogeny of the butterfly tribe Brassolini. We found that endemic species to Mesoamerica plus NW Andes have originated by old dispersal events into the region, and that speciation rates increased only at about 2 Ma (cradle of diversity). In contrast, endemic species to the Brazilian Atlantic Forest likely arose by low and continuous speciation rates since about 10 Ma (museum of diversity), and this region was likely intermittently connected to Amazonia since the Miocene. This dynamic evolutionary history appears to reflect paleoenvironmental changes, including landscape reconfigurations in Central America and paleoclimate fluctuations during the Neogene and Quaternary periods. Our findings reinforce the interpretation of Neotropical rainforests expanding during Miocene, which likely facilitated dispersal and speciation of taxa associated to such biomes.

## Acknowledgements

We are grateful to Carlos Peña, Mirna Casagrande, Helena Romanowski, Augusto H. B. Rosa and Andrew Warren for contributing specimens used in this study; and to Diana Silva, Gerardo Lamas and SERFOR (Ministerio de Agricultura, Peru) for assistance with research permits (No Autorización 223-2017-SERFOR/DGGSPFFS). We also are grateful to the ICMBio for the research permits (SISBIO nº 10802-5, 10802-24 and 53016-10). We acknowledge the computational resources provided by the CESNET LM2015042 and the CERIT Scientific Cloud LM2015085, provided under the programme "Projects of Large Research, Development, and Innovations Infrastructures". This publication is part of the RedeLep 'Rede Nacional de Pesquisa e Conservação de Lepidópteros' SISBIOTA-Brasil/CNPq (563332/2010-7).

## Funding

PMM was supported by a Marie Skłodowska-Curie fellowship (European Commission, Grant No. MARIPOSAS-704035), and by a fellowship from the PPLZ programme (Czech Academy of Sciences, Fellowship No. L200961951). AVLF acknowledges support from FAPESP (2011/50225-3, 2012/50260-6, 2013/50297-0), from the Brazilian Research Council - CNPq (303834/2015-3), from the National Science Foundation (DEB-1256742) and from the United States Agency for International Development - USAID / the U.S. National Academy of Sciences (NAS), under the PEER program (Sponsor Grant Award Number: AID-OAA-A-11-00012) (Mapping and Conserving Butterfly Biodiversity in the Brazilian Amazon). AA acknowledges support from the Swedish Research Council, the Swedish Foundation for Strategic Research, the Knut and Alice Wallenberg Foundation, and the Royal Botanic Gardens, Kew.

## **Author contributions**

PMM, NW, and CMP conceived the project, PMM, AVLF, PJD, and CMP conducted fieldwork, PMM carried out the lab experiments and led the data analyses, PMM wrote the first draft of the manuscript, and all authors discussed and contributed to the final product.



# References

- Antonelli, A. and Sanmartín, I. 2011. Why are there so many plant species in the Neotropics? - Taxon 60: 403–414.
- Antonelli, A. et al. 2009. Tracing the impact of the Andean uplift on Neotropical plant evolution. - Proc. Natl. Acad. Sci. 106: 9749–9754.
- Antonelli, A. et al. 2018a. Conceptual and empirical advances in Neotropical biodiversity research. - PeerJ 6: e5644.
- Antonelli, A. et al. 2018b. Amazonia is the primary source of Neotropical biodiversity. - Proc. Natl. Acad. Sci. 115: 6034–6039.
- Austin, G. T. et al. 2007. A new species of *Opsiphanes* Doubleday, [1849] from western Mexico (Nymphalidae: Morphinae: Brassolini). - Bull. Allyn Mus. 150: 1–20.
- Bacon, C. D. et al. 2015. Biological evidence supports an early and complex emergence of the Isthmus of Panama. - Proc. Natl. Acad. Sci. 112: 6110–6115.
- Basset, Y. et al. 2015. The butterflies of Barro Colorado Island, Panama: local extinction since the 1930s. - PLoS One 10: e0136623.
- Batalha-Filho, H. et al. 2013. Connections between the Atlantic and the Amazonian forest avifaunas represent distinct historical events. - J. Ornithol. 154: 41–50.
- Beccalconi, G. W. et al. 2008. Catalogue of the hostplants of the Neotropical butterflies/Catálogo de las plantas huésped de las mariposas neotropicales.
- Bernal, R. et al. 2019. Could coastal plants in western Amazonia be relicts of past marine incursions? - J. Biogeogr. 46: 1749–1759.
- Bouckaert, R. R. and Drummond, A. J. 2017. bModelTest: Bayesian phylogenetic site model averaging and model comparison. - BMC Evol. Biol. 17: 42.

- 534 Bouckaert, R. et al. 2014. BEAST 2: a software platform for Bayesian evolutionary analysis. -  
535 PLoS Comput. Biol. 10: e1003537.
- 536 Bristow, C. R. 1981. A revision of the brassoline genus *Catoblepia* (Lepidoptera: Rhopalocera). -  
537 Zool. J. Linn. Soc. 72: 117–163.
- 538 Bristow, C. R. 1982. A revision of the brassoline genus *Selenophanes* (Lepidoptera:  
539 Rhopalocera). - Zool. J. Linn. Soc. 76: 273–291.
- 540 Bristow, C. R. 1991. A revision of the brassoline genus *Opsiphanes* (Lepidoptera: Rhopalocera).  
541 - Zool. J. Linn. Soc. 101: 203–293.
- 542 Capurro, J. M. G. et al. 2018. Connecting Amazonian, Cerrado, and Atlantic forest histories:  
543 Paraphyly, old divergences, and modern population dynamics in tyrant-manakins  
544 (*Neopelma/Tyrannetes*, Aves: Pipridae). - Mol. Phylogenet. Evol. 127: 696–705.
- 545 Casagrande, M. M. 1982. Quatro gêneros novos de Brassolinae (Lepidoptera-Nymphalidae). -  
546 Rev. Bras. Entomol. 26: 355–356.
- 547 Casagrande, M. M. 1995. Notas sistemáticas sobre Brassolinae. I. Tribos (Lepidoptera,  
548 Nymphalidae). - Rev. Bras. Zool. 12: 671–699.
- 549 Casagrande, M. M. 2002. Naropini Stichel, taxonomia e imaturos (Lepidoptera, Nymphalidae,  
550 Brassolinae). - Rev. Bras. Zool. 19: 467–569.
- 551 Casagrande, M. M. 2004. Brassolini: Checklist. Part 4A. Hesperioidea - Papilionoidea. - In:  
552 Heppner, J. B. and Lamas, G. (eds), Atlas of Neotropical Lepidoptera. Association of  
553 Tropical Lepidoptera/Scientific publishers, pp. 201–205.
- 554 Chacón, I. A. et al. 2012. A new species of *Opsiphanes* Doubleday, [1849] from Costa Rica  
555 (Nymphalidae: Morphinae: Brassolini), as revealed by its DNA barcodes and habitus. -  
556 Bull. Allyn Mus. 166: 1–15.

557 Chazot, N. et al. 2019a. Priors and posteriors in Bayesian timing of divergence analyses: the age  
558 of butterflies revisited. - *Syst. Biol.* 68: 797–813.

559 Chazot, N. et al. 2019b. Renewed diversification following Miocene landscape turnover in a  
560 Neotropical butterfly radiation. - *Glob. Ecol. Biogeogr.* 28: 1118–1132.

561 Coates, A. G. and Stallard, R. F. 2013. How old is the Isthmus of Panama? - *Bull. Mar. Sci.* 89:  
562 801–813.

563 Coates, A. G. et al. 2004. The geology of the Darien, Panama, and the late Miocene-Pliocene  
564 collision of the Panama arc with northwestern South America. - *Bull. Geol. Soc. Am.* 116:  
565 1327–1344.

566 Condamine, F. L. et al. 2012. Biogeographic and diversification patterns of Neotropical Troidini  
567 butterflies (Papilionidae) support a museum model of diversity dynamics for Amazonia. -  
568 *BMC Evol. Biol.* 12: 82.

569 Costa, L. P. 2003. The historical bridge between the Amazon and the Atlantic Forest of Brazil: a  
570 study of molecular phylogeography with small mammals. - *J. Biogeogr.* 30: 71–86.

571 DeVries, P. J. 1983. Checklist of butterflies and natural history. - In: Janzen, D. H. (ed), Costa  
572 Rican Natural History. University of Chicago Press, pp. 654–678.

573 DeVries, P. J. 1994. Patterns of butterfly diversity and promising topics in natural history and  
574 ecology. - In: McDade, L. A. et al. (eds), *La Selva: Ecology and Natural History of a*  
575 *Neotropical Rain Forest*. The University of Chicago Press, pp. 187–194.

576 Dexter, K. G. et al. 2017. Dispersal assembly of rain forest tree communities across the Amazon  
577 basin. - *Proc. Natl. Acad. Sci.* 114: 2645–2650.

578 Dickens, J. K. et al. 2019. The butterflies of a Cerrado–Atlantic Forest ecotone at Laguna Blanca  
579 reveal underestimation of Paraguayan butterfly diversity and need for conservation. - *J.*

580 Insect Conserv. 23: 707–728.

581 Dupin, J. et al. 2017. Bayesian estimation of the global biogeographical history of the

582 Solanaceae. - J. Biogeogr. 44: 887–899.

583 Edler, D. et al. 2017. Infomap Bioregions: interactive mapping of biogeographical regions from

584 species distributions. - Syst. Biol. 66: 197–204.

585 Edwards, E. J. et al. 2010. The origins of C<sub>4</sub> grasslands: integrating evolutionary and ecosystem

586 science. - Science 328: 587–591.

587 Emery, E. de O. et al. 2006. As borboletas (Lepidoptera, Papilionoidea) do Distrito Federal,

588 Brasil. - Rev. Bras. Entomol. 50: 85–92.

589 Espeland, M. et al. 2018. A comprehensive and dated phylogenomic analysis of butterflies. -

590 Curr. Biol. 28: 770–778.

591 Freitas, A. V. L. and Brown, K. S. Jr. 2004. Phylogeny of the Nymphalidae (Lepidoptera). - Syst.

592 Biol. 53: 363–383.

593 Furtado, E. and Campos-Neto, F. C. 2004. *Caligopsis seleucida* (Hewitson) e seus estágios

594 imaturos (Lepidoptera, Nymphalidae, Brassolinae). - Rev. Bras. Zool. 21: 593–597.

595 Garzón-Orduña, I. J. and Penz, C. M. 2009. Phylogeny of *Dynastor* and *Brassolis* butterflies

596 (Lepidoptera: Nymphalidae): a tough nut to crack. - Zootaxa 2134: 1–22.

597 Goldberg, E. E. et al. 2005. Diversity, endemism, and age distributions in macroevolutionary

598 sources and sinks. - Am. Nat. 165: 623–633.

599 Hosner, P. A. et al. 2016. Rapid and recent diversification of curassows, guans, and chachalacas

600 (Galliformes: Cracidae) out of Mesoamerica: phylogeny inferred from mitochondrial,

601 intron, and ultraconserved element sequences. - Mol. Phylogenet. Evol. 102: 320–330.

602 Igea, J. and Tanentzap, A. J. 2019. Multiple macroevolutionary routes to becoming a biodiversity

hotspot. - Sci. Adv. 5: eaau8067.

Jablonski, D. et al. 2006. Out of the tropics: evolutionary diversity gradient. - Science 314: 102–106.

Janzen, D. H. and Hallwachs, W. 2009. Dynamic database for an inventory of the macrocaterpillar fauna, and its food plants and parasitoids, of Area de Conservacion Guanacaste (ACG), northwestern Costa Rica. <<http://janzen.sas.upenn.edu>>.

Janzen, D. H. et al. 2009. Integration of DNA barcoding into an ongoing inventory of complex tropical biodiversity. - Mol. Ecol. Resour. 9: 1–26.

Jaramillo, C. 2018. Evolution of the Isthmus of Panama: Biological, paleoceanographic and paleoclimatological implications. - In: Hoorn, C. et al. (eds), Mountains, Climate and Biodiversity. First. John Wiley & Sons, Ltd, pp. 323–338.

Jaramillo, C. and Cárdenas, A. 2013. Global warming and Neotropical rainforests: a historical perspective. - Annu. Rev. Earth Planet. Sci. 41: 741–766.

Jaramillo, C. et al. 2017a. Comment (1) on “Formation of the Isthmus of Panama” by O’Dea *et al.* - Sci. Adv. 3: e1602321.

Jaramillo, C. et al. 2017b. Miocene flooding events of western Amazonia. - Sci. Adv. 3: e1601693.

Ledo, R. M. D. and Colli, G. R. 2017. The historical connections between the Amazon and the Atlantic Forest revisited. - J. Biogeogr. 44: 2551–2563.

Lewis, P. O. 2001. A likelihood approach to estimating phylogeny from discrete morphological character data. - Syst. Biol. 50: 913–925.

Liu, L. et al. 2015. Coalescent methods are robust to the simultaneous effects of long branches and incomplete lineage sorting. - Mol. Biol. Evol. 32: 791–805.

626 Löwenberg-Neto, P. 2014. Neotropical region: a shapefile of Morrone's (2014) biogeographical  
627 regionalisation. - Zootaxa 3802: 300.

628 Matos-Maraví, P. 2016. Investigating the timing of origin and evolutionary processes shaping  
629 regional species diversity: Insights from simulated data and Neotropical butterfly  
630 diversification rates. - Evolution 70: 1638–1650.

631 Matzke, N. J. 2013. Probabilistic historical biogeography: new models for founder-event  
632 speciation, imperfect detection, and fossils allow improved accuracy and model-testing. -  
633 Front. Biogeogr. 5: 242–248.

634 Matzke, N. J. 2014. Model selection in historical biogeography reveals that founder-event  
635 speciation is a crucial process in island clades. - Syst. Biol. 63: 951–970.

636 McKenna, D. D. and Farrell, B. D. 2006. Tropical forests are both evolutionary cradles and  
637 museums of leaf beetle diversity. - Proc. Natl. Acad. Sci. 103: 10947–10951.

638 Melo, D. H. A. et al. 2019. Butterflies (Lepidoptera: Papilionoidea) of an urban park in  
639 northeastern Brazil. - Biota Neotrop. 19: e20180614.

640 Miller, M. A. et al. 2010. Creating the CIPRES Science Gateway for inference of large  
641 phylogenetic trees. - Proc. Gatew. Comput. Environ. Work. (GCE), 14 Nov.: 1–8.

642 Montes, C. et al. 2012. Arc-continent collision and orocline formation: closing of the Central  
643 American seaway. - J. Geophys. Res. 117: B04105.

644 Montes, C. et al. 2015. Middle Miocene closure of the Central American Seaway. - Science 348:  
645 226–229.

646 Moore, B. R. et al. 2016. Critically evaluating the theory and performance of Bayesian analysis  
647 of macroevolutionary mixtures. - Proc. Natl. Acad. Sci. 113: 9569–9574.

648 Moreau, C. S. and Bell, C. D. 2013. Testing the museum versus cradle tropical biological

diversity hypothesis: phylogeny, diversification, and ancestral biogeographic range  
 evolution of the ants. - *Evolution* 67: 2240–2257.

Moritz, C. et al. 2000. Diversification of rainforest faunas: An integrated molecular approach. -  
*Annu. Rev. Ecol. Syst.* 31: 533–563.

Morrone, J. J. 2014. Biogeographical regionalisation of the Neotropical region. - *Zootaxa* 3782:  
 1–110.

Mullen, S. P. et al. 2011. Rapid diversification and not clade age explains high diversity in  
 neotropical *Adelpha* butterflies. - *Proc. R. Soc. B Biol. Sci.* 278: 1777–1785.

Myers, N. et al. 2000. Biodiversity hotspots for conservation priorities. - *Nature* 403: 853–858.

O’Dea, A. et al. 2016. Formation of the Isthmus of Panama. - *Sci. Adv.* 2: e1600883.

Ogilvie, H. A. et al. 2017. StarBEAST2 brings faster species tree inference and accurate  
 estimates of substitution rates. - *Mol. Biol. Evol.* 34: 2101–2114.

Penz, C. M. 2007. Evaluating the monophyly and phylogenetic relationships of Brassolini genera  
 (Lepidoptera, Nymphalidae). - *Syst. Entomol.* 32: 668–689.

Penz, C. M. 2008. Phylogenetic revision of *Eryphanis* Boisduval, with a description of a new  
 species from Ecuador (Lepidoptera, Nymphalidae). - *Insecta mundi* 0035: 1–25.

Penz, C. M. 2009a. Phylogeny of *Dasyophthalma* butterflies (Lepidoptera, Nymphalidae,  
 Brassolini). - *Insecta mundi* 0069: 1–12.

Penz, C. M. 2009b. The phylogeny of *Opoptera* butterflies, and an assessment of the systematic  
 position of *O. staudingeri* (Lepidoptera, Nymphalidae). - *Zootaxa* 1985: 1–20.

Penz, C. M. et al. 2011a. Neotropical *Blepolenis* butterflies: wing pattern elements, phylogeny,  
 and Pleistocene diversification (Lepidoptera, Nymphalidae). - *Zootaxa* 2897: 1–17.

Penz, C. M. et al. 2011b. A new *Orobrassolis* butterfly (Nymphalidae, Brassolini): a casualty of

672 habitat destruction? - Zootaxa 2740: 35–43.

673 Penz, C. M. et al. 2013. Adult and early-stage characters of Brassolini contain conflicting  
674 phylogenetic signal (Lepidoptera, Nymphalidae). - Syst. Entomol. 38: 316–333.

675 Penz, C. et al. 2015. Butterfly dispersal across Amazonia and its implication for biogeography. -  
676 Ecography 38: 410–418.

677 Penz, C. M. et al. 2017. Documenting diversity in the Amazonian butterfly genus *Bia*  
678 (Lepidoptera, Nymphalidae). - Zootaxa 4258: 201–237.

679 Pereira Martins, L. et al. 2017. Butterflies of Amazon and Cerrado remnants of Maranhão,  
680 Northeast Brazil. - Biota Neotrop. 17: e20170335.

681 Pérez-Escobar, O. A. et al. 2019. The origin and diversification of the hyperdiverse flora in the  
682 Chocó biogeographic region. - Front. Plant Sci. in press.

683 Pérez, J. H. et al. 2017. Long term survey of the butterfly fauna of Curitiba, Paraná, Brazil: how  
684 does a scientific collection gather local biodiversity information? (Lepidoptera:  
685 Papilionoidea). - Shil. Rev. Lepidopterol. 45: 433–446.

686 Pinheiro, C. E. G. and Emery, E. de O. 2006. As borboletas (Lepidoptera: Papilionoidea e  
687 Hesperioidea) da área de Proteção Ambiental do Gama e Cabeça de Veado (Distrito  
688 Federal, Brasil). - Biota Neotrop. 6: bn01506032006.

689 Prates, I. et al. 2016. A mid-Pleistocene rainforest corridor enabled synchronous invasions of the  
690 Atlantic Forest by Amazonian anole lizards. - Mol. Ecol. 25: 5174–5186.

691 R Core Team 2019. R: A language and environment for statistical computing. Version 3.5.3.:  
692 <http://www.r-project.org>.

693 Rabosky, D. L. 2014. Automatic detection of key innovations, rate shifts, and diversity-  
694 dependence on phylogenetic trees. - PLoS One 9: e89543.



695 Rabosky, D. L. et al. 2014. BAMMtools: An R package for the analysis of evolutionary  
696 dynamics on phylogenetic trees. - *Methods Ecol. Evol.* 5: 701–707.

697 Rabosky, D. L. et al. 2017. Is BAMM flawed? Theoretical and practical concerns in the analysis  
698 of multi-rate diversification. - *Syst. Biol.* 66: 477–498.

699 Rambaut, A. et al. 2018. Posterior summarization in Bayesian phylogenetics using Tracer 1.7. -  
700 *Syst. Biol.* 67: 901–904.

701 Ree, R. H. et al. 2005. A likelihood framework for inferring the evolution of geographic range on  
702 phylogenetic trees. - *Evolution* 59: 2299–2311.

703 Roy, K. and Goldberg, E. E. 2007. Origination, extinction, and dispersal: integrative models for  
704 understanding present-day diversity gradients. - *Am. Nat.* 170: S71–S85.

705 Santos, J. P. dos et al. 2011. Fruit-feeding butterflies guide of subtropical Atlantic Forest and  
706 Araucaria Moist Forest in State of Rio Grande do Sul, Brazil. - *Biota Neotrop.* 11: 253–274.

707 Santos, J. P. dos et al. 2018. Atlantic butterflies: a data set of fruit-feeding butterfly communities  
708 from the Atlantic forests. - *Ecology* 99: 2875.

709 Shirai, L. T. et al. 2017. Natural history of *Selenophanes cassiope guarany* (Lepidoptera:  
710 Nymphalidae: Brassolini): an integrative approach, from molecules to ecology. - *Ann.*  
711 *Entomol. Soc. Am.* 110: 145–159.

712 Silva, A. R. M. et al. 2012. Borboletas frugívoras (Lepidoptera: Nymphalidae) de uma área  
713 urbana (Área de Proteção Especial Manancial Cercadinho) em Belo Horizonte, Minas  
714 Gerais, Brasil. - *Biota Neotrop.* 12: 292–297.

715 Simon, M. F. et al. 2009. Recent assembly of the Cerrado, a neotropical plant diversity hotspot,  
716 by in situ evolution of adaptations to fire. - *Proc. Natl. Acad. Sci.* 106: 20359–20364.

717 Soldati, D. et al. 2019. Butterfly fauna (Lepidoptera, Papilionoidea) in a heterogeneous area

between two biodiversity hotspots in Minas Gerais, Brazil. - Pap. Avulsos Zool. 59:  
e20195902.

Stichel, H. 1916. Neues über Genus *Narope* Westw. - Neue Beiträge zur Syst. Insektenkd. 1:  
7–8.

Strömberg, C. A. E. 2011. Evolution of grasses and grassland ecosystems. - Annu. Rev. Earth  
Planet. Sci. 39: 517–544.

Thomé, M. T. C. et al. 2016. Recurrent connections between Amazon and Atlantic forests shaped  
diversity in Caatinga four-eyed frogs. - J. Biogeogr. 43: 1045–1056.

Trujillo-Arias, N. et al. 2017. The niche and phylogeography of a passerine reveal the history of  
biological diversification between the Andean and the Atlantic forests. - Mol. Phylogenet.  
Evol. 112: 107–121.

Wahlberg, N. and Wheat, C. W. 2008. Genomic outposts serve the phylogenomic pioneers:  
designing novel nuclear markers for genomic DNA extractions of Lepidoptera. - Syst. Biol.  
57: 231–242.

Wahlberg, N. et al. 2009. Nymphalid butterflies diversify following near demise at the  
Cretaceous/Tertiary boundary. - Proc. R. Soc. B Biol. Sci. 276: 4295–4302.

Werneck, F. P. 2011. The diversification of eastern South American open vegetation biomes:  
historical biogeography and perspectives. - Quat. Sci. Rev. 30: 1630–1648.

Wesselingh, F. P. and Salo, J. A. 2006. A Miocene perspective on the evolution of the  
Amazonian biota. - Scr. Geol. 133: 439–458.

Wiens, J. J. and Donoghue, M. J. 2004. Historical biogeography, ecology and species richness. -  
Trends Ecol. Evol. 19: 639–644.

Xing, Y. and Ree, R. H. 2017. Uplift-driven diversification in the Hengduan Mountains, a

741       temperate biodiversity hotspot. - Proc. Natl. Acad. Sci. 114: E3444–E3451.

742       Zacca, T. and Bravo, F. 2012. Borboletas (Lepidoptera: Papilionoidea e Hesperioidea) da porção

743       norte da Chapada Diamantina, Bahia, Brasil. - Biota Neotrop. 12: 117–126.

744

745       **Supplementary material (available online as Appendix 1 at website). Appendix 1.**

746

747

## Figures

Fig. 1: Map of the Neotropics and the defined bioregions based on occurrence data of Brassolini. Inset map shows the strongest clustering by the software Infomap Bioregions using validated geo-coordinates from GBIF and ATLANTIC BUTTERFLIES databases. Bioregions are delineated based on Morrone's (2014) Neotropical provinces, encompassing the Mesoamerican plus Pacific dominions, except for three provinces east of the northern Andes; the Paraná dominion (Brazilian Atlantic Forest); the remaining dominions and provinces where Brassolini occurs. Shapefile from Löwenberg-Neto (2014).

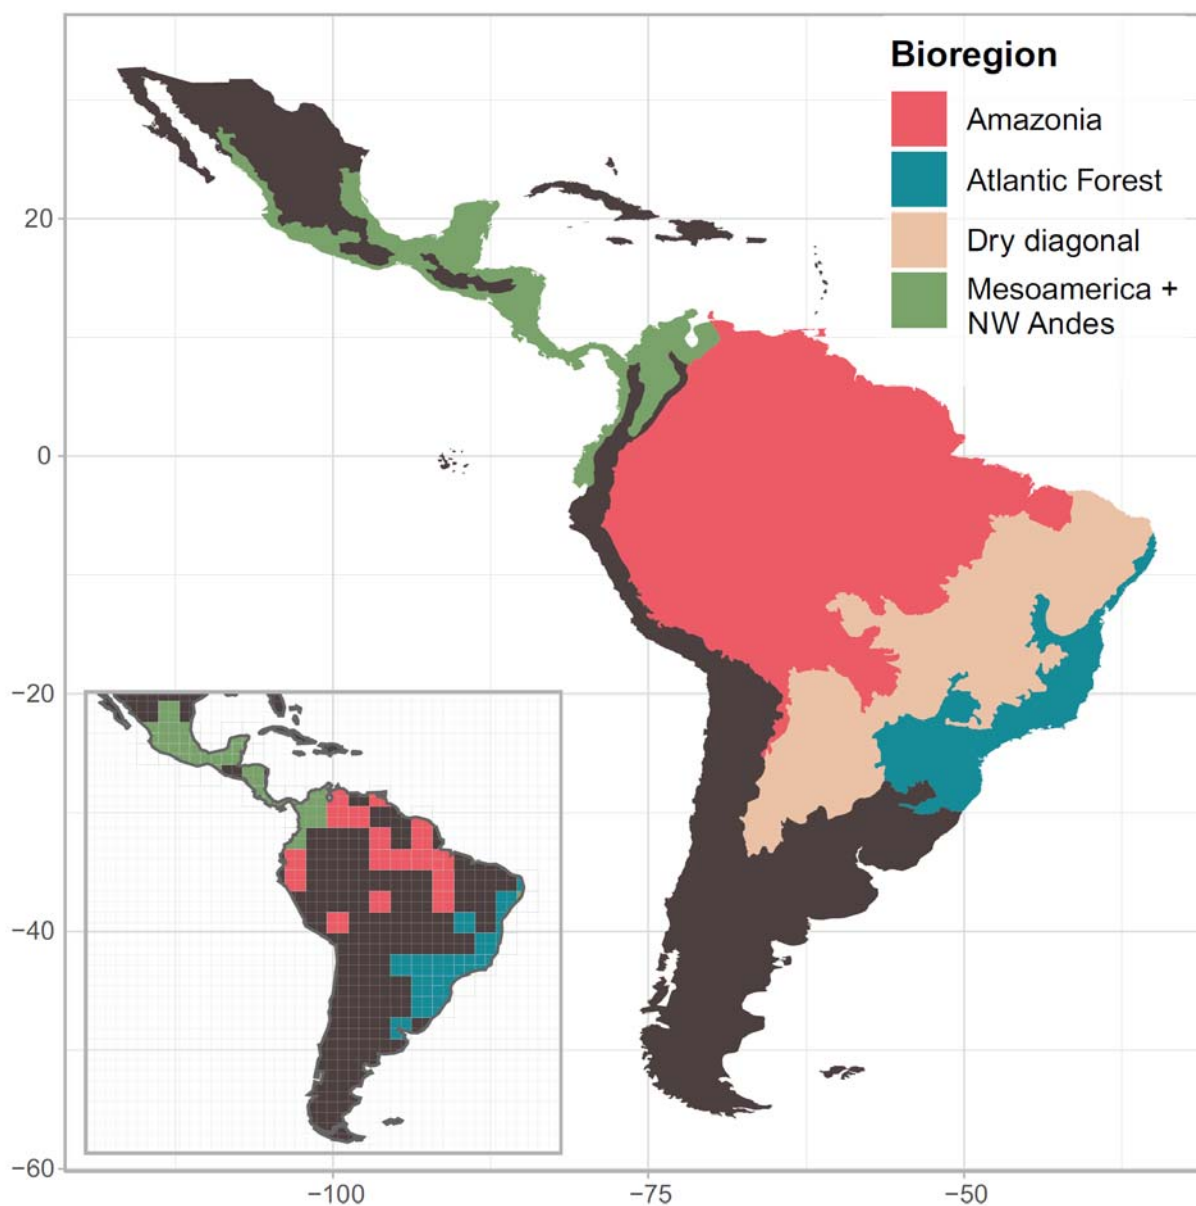

757

758

759

760 Fig. 2: Time-calibrated species tree of the butterfly tribe Brassolini. The posterior probabilities  
 761 for all genera and among genera are displayed next to the crown node. Ancestral range  
 762 probability based on the DEC model and 10,000 biogeographical stochastic mappings is depicted  
 763 as a pie chart following colors in legend. Images of representative butterflies of all Brassolini  
 764 genera, all at the same scale: From top to down, *Bia actorion* (DeVries collection, PJD),  
 765 *Dynastor darius* (Milwaukee Public Museum, MPM), *Dasyophthalma creusa* (MPM), *Opoptera*  
 766 *fruhstorferi* (American Museum of the Natural History, AMNH), *Narope panniculus* (AMNH),  
 767 *Caligopsis seleucida* (PJD), *Eryphanis aesacus* (MPM), *Caligo martia* (MPM), *Brassolis astyra*  
 768 (MPM), *Selenophanes cassiope* (PJD), *Catoblepia berecynthia* (MPM), *Penetes pamphanis*  
 769 (MPM), *Mielkella singularis* (AMNH), *Orobrassolis ornamentalis* (MPM), *Blepolenis bassus*  
 770 (Museu de Zoologia - USP), *Opsiphanes quiteria* (PJD).

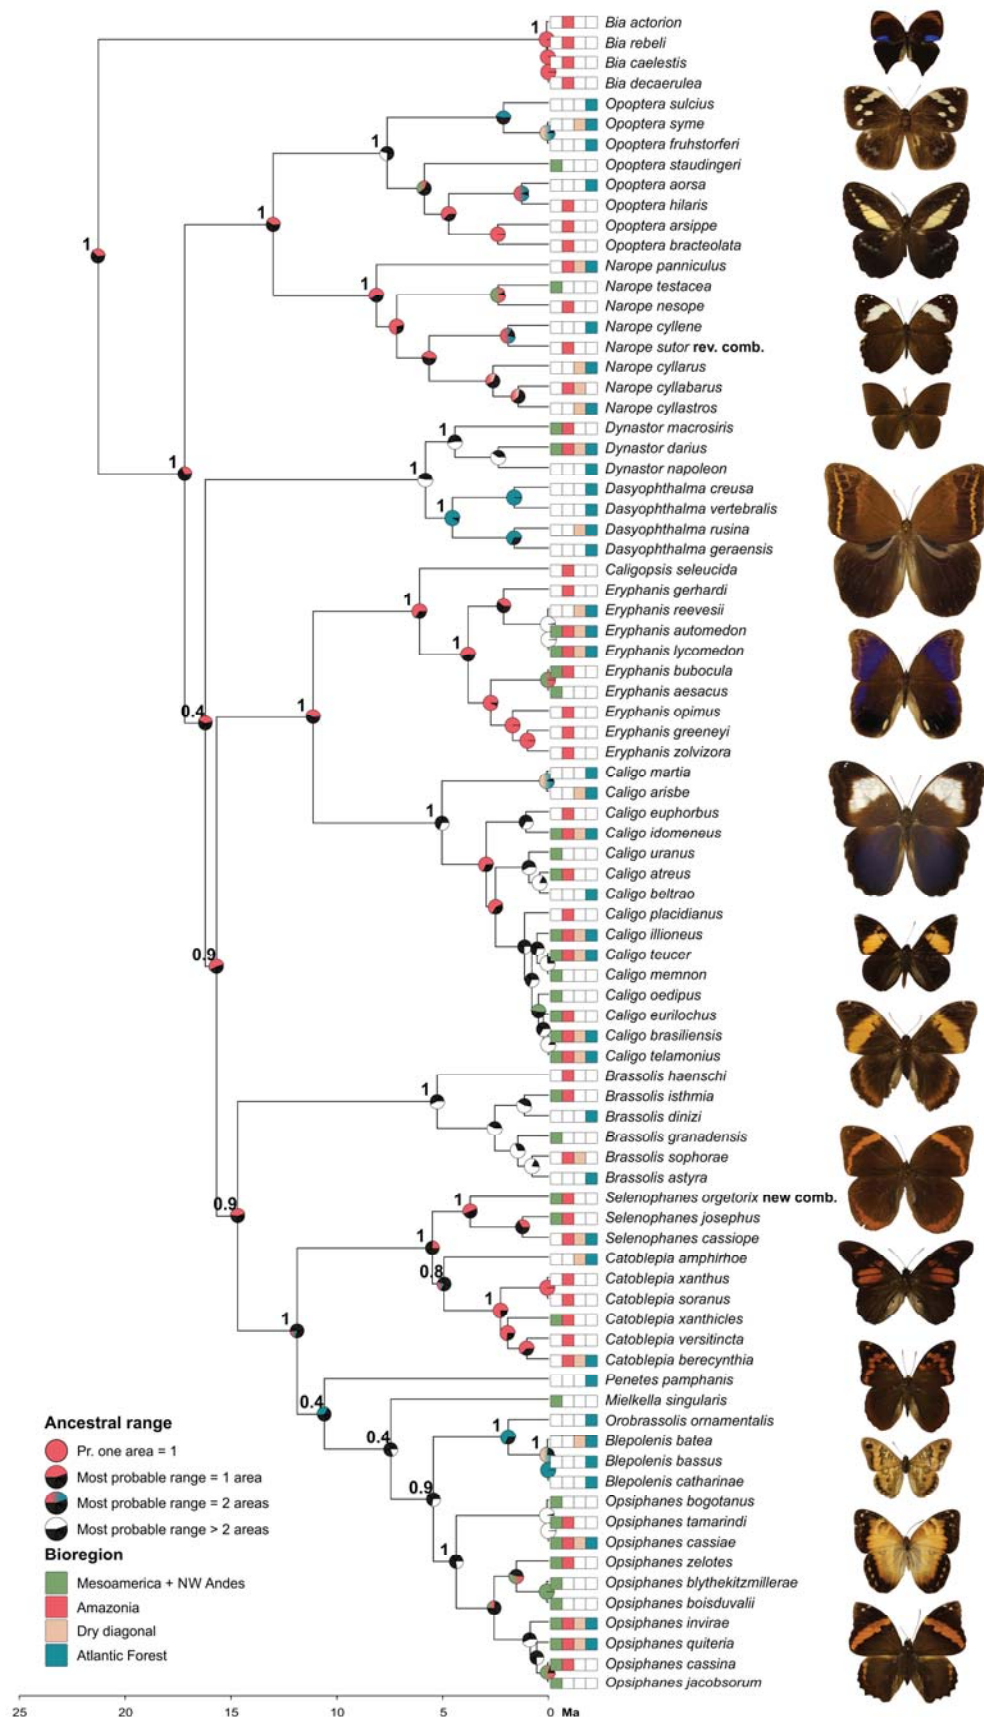

772 Fig. 3: Colonization rates through-time based on 10,000 biogeographical stochastic mappings in  
 773 BioGeoBEARS. Rates are displayed for a select pair of areas. Source areas (dispersal from)  
 774 follow the color in the legend. Solid lines are the median values, colored ribbons are the lower  
 775 and upper quartiles (0.25 and 0.75 quantiles), and dashed lines are the 0.1 and 0.9 quantiles.  
 776



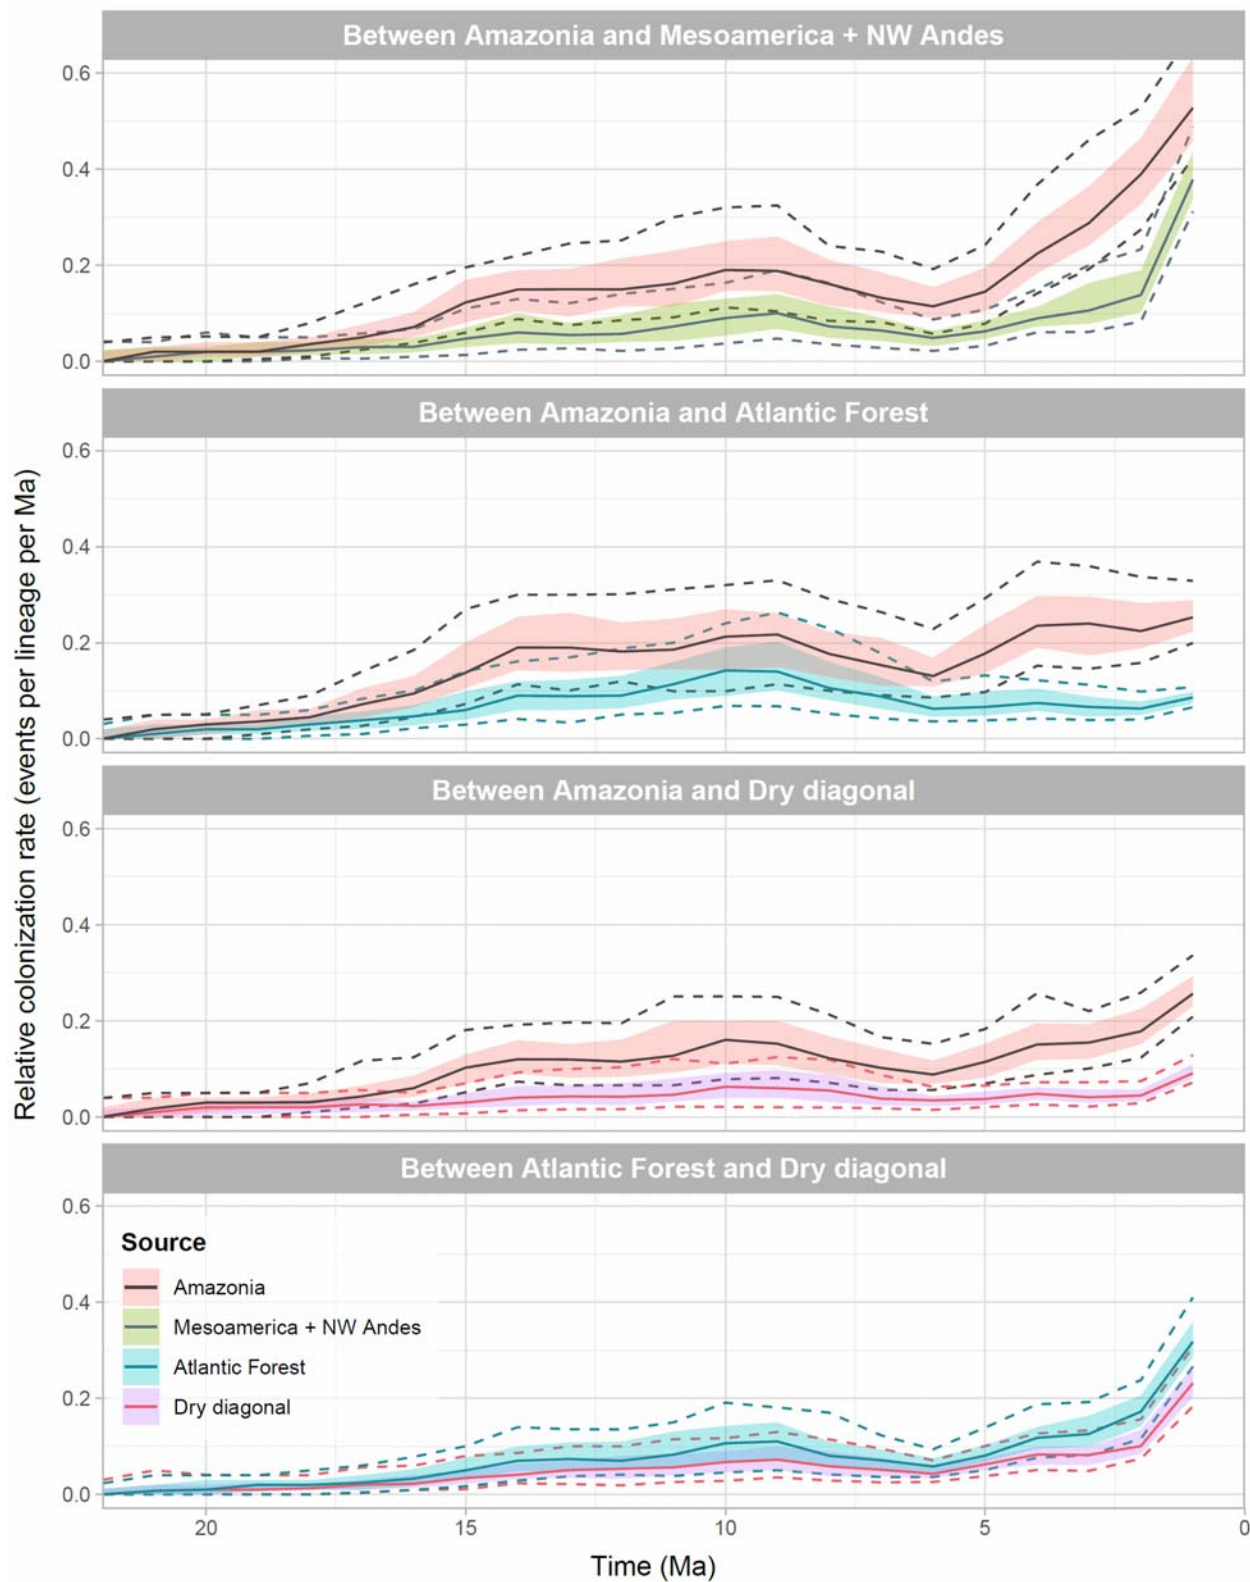

777

Fig. 4: Within-area speciation through-time based on 10,000 biogeographical stochastic mappings in BioGeoBEARS and on per-lineage speciation rates by BAMM. A) The relative number of *in situ* cladogenesis calculated using a formula modified from Xing and Ree (2017). Solid lines represent median values, colored ribbons represent lower and upper quartiles (0.25 and 0.75 quantiles) and dashed lines represent 0.1 and 0.9 quantiles. The x-axis is truncated at 8 Ma. B) Solid lines represent mean speciation rates per lineage and the colored ribbons the 5% and 95% confidence intervals. The x-axis is truncated at 8 Ma. C) Species (tips) specific speciation rates as estimated by BAMM. Box plots per area show estimates from the posterior distribution, and the cross within each box plot represents mean speciation rates per area.

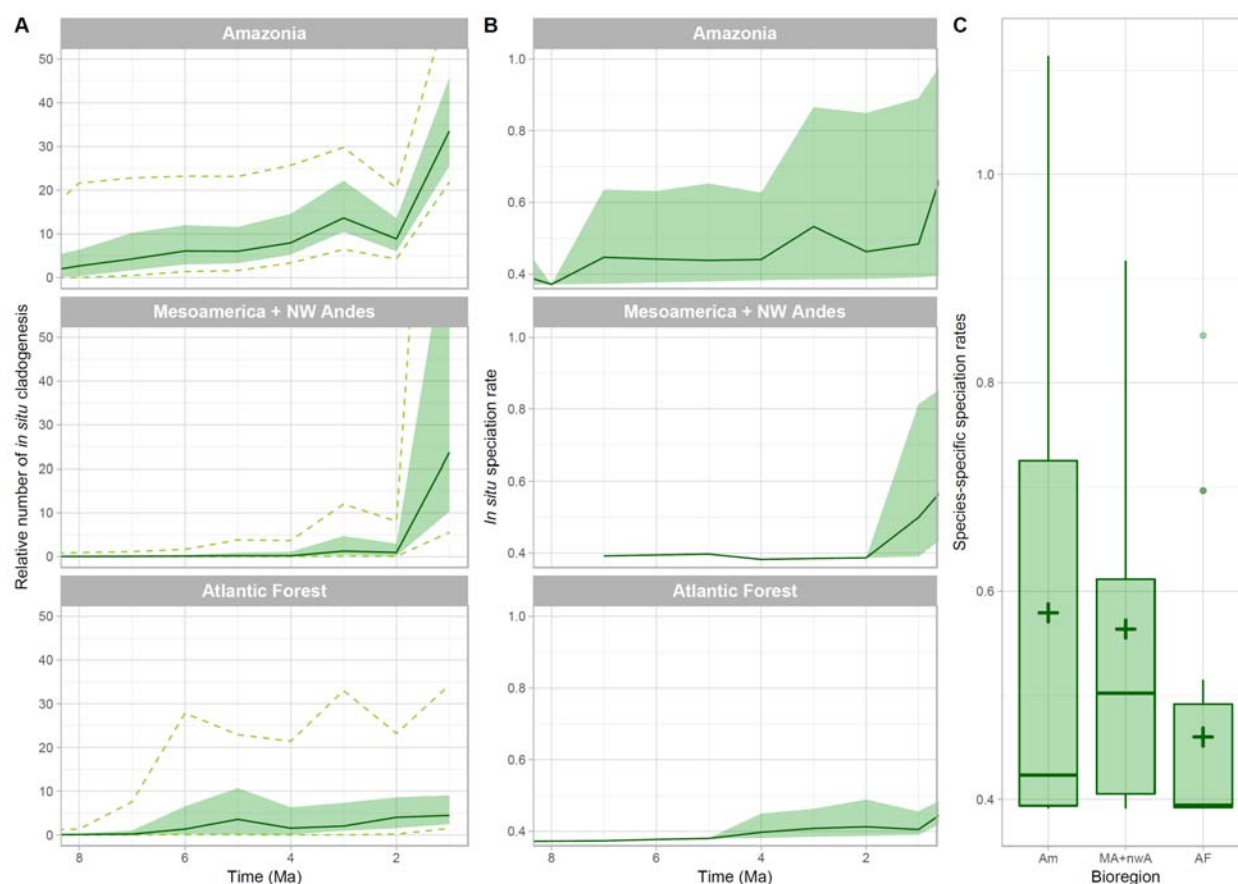

789 Fig. 5: Summary of Brassolini colonization and speciation estimates in three time-windows, at  
 790 10, 5 and 1 Ma. Colored directional arrows represent dispersal from source areas, following  
 791 colors in legend. The width and shape of arrows represent the estimated relative colonization rate  
 792 between two areas in BioGeoBEARS, as depicted in Fig. 3. Bioregions were colored to  
 793 qualitatively represent the estimated relative cladogenesis/speciation rates, as either center of  
 794 speciation or area with comparatively lower speciation rates per time window.

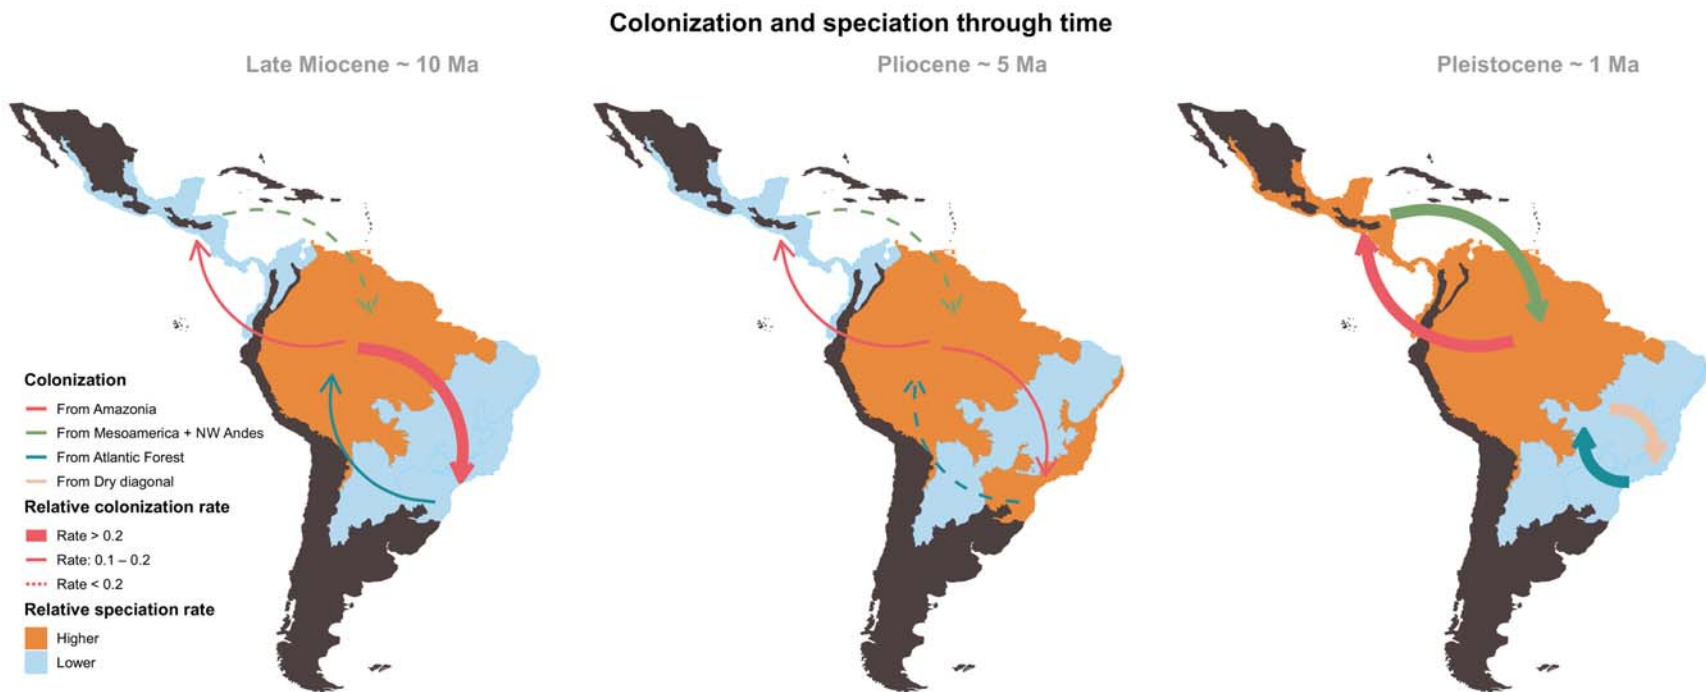

795
